# Supplementary material
Source: MDPI journal article supplement (https://www.mdpi.com/2073-4441/7/2/747)
Supplement: s2 [file s2]

Supplementary Materials

**Table S1.** List of IMGW-PIB meteorological stations with precipitation data availability used in this study.

| **No.** | **Station Name** | **Code** | **Station Type** | **Localisation (Relation to Catchment)** | **Period of Available Data** | **Years** |
| --- | --- | --- | --- | --- | --- | --- |
| 1 | Częstochowa | CZES | synoptic | inside | 1982–2011 | 30 |
| 2 | Katowice | KATO | synoptic | outside | 1982–2011 | 30 |
| 3 | Kielce | KIEL | synoptic | outside | 1982–2011 | 30 |
| 4 | Kraków | KRAK | synoptic | outside | 1982–2011 | 30 |
| 5 | Łódź | LODZ | synoptic | outside | 1982–2011 | 30 |
| 6 | Sulejów | SULE | synoptic | inside | 1982–2011 | 30 |
| 7 | Bełchatów | BCHW | climate | outside | 2, 1986, 1995; 1996–2011 | 25 |
| 8 | Bodzentyn | BODZ | climate | outside | 1982–2011 | 30 |
| 9 | Bonowice/Szczekociny * | BONO | climate | inside | 1982–2011 | 30 |
| 10 | Jędrzejów/Skroniów * | JDRZ | climate | outside | 1982–2011 | 30 |
| 11 | Lgota Górna | LGOT | climate | outside | 1982–2011 | 30 |
| 12 | Łaziska | LAZI | climate | outside | 1982–2011 | 30 |
| 13 | Miechów | MCHW | climate | outside | 1982–1984; 1986–2011 | 29 |
| 14 | Olewin | OLEW | climate | outside | 1982–2011 | 30 |
| 15 | Silniczka | SILN | climate | inside | 1982–2011 | 30 |
| 16 | Włochów | WCHW | climate | inside | 1986–2011 | 26 |
| 17 | Ząbkowice | ZABK | climate | outside | 1982–2011 | 30 |
| 18 | Bartków | BART | precipitation | outside | 1982–2011 | 30 |
| 19 | Bobry | BOBR | precipitation | outside | 1982–2011 | 30 |
| 20 | Chełsty | CHEL | precipitation | inside | 1982–2011 | 30 |
| 21 | Cielętniki | CIEL | precipitation | outside | 1982–2011 | 30 |
| 22 | Czarnca | CZAR | precipitation | inside | 1982–2011 | 30 |
| 23 | Dobryszyce | DOBR | precipitation | outside | 1982–2011 | 30 |
| 24 | Januszewice | JANU | precipitation | inside | 11, 1997–2011 | 13 ** |
| 25 | Kępie | KEPI | precipitation | inside | 1982–2011 | 30 |
| 26 | Koniecpol | KCPL | precipitation | inside | 1982–2008 | 27 |
| 27 | Konieczno | KCZO | precipitation | inside | 1982–2011 | 30 |
| 28 | Końskie | KONS | precipitation | outside | 1982–2011 | 30 |
| 29 | Kruszów | KRSZ | precipitation | outside | 1982–2011 | 30 |
| 30 | Lelów | LELW | precipitation | outside | 1982–2011 | 30 |
| 31 | Lutosławice Rządowe | LUTO | precipitation | outside | 1982–2011 | 30 |
| 32 | Łazy k. Olkusza | LAZY | precipitation | outside | 1982–2011 | 30 |
| 33 | Małogoszcz | MALO | precipitation | outside | 1982–2011 | 30 |
| 34 | Mroczków | MRCZ | precipitation | outside | 1982–2011 | 30 |
| 35 | Opoczno | OPCZ | precipitation | outside | 1982–2011 | 30 |
| 36 | Pilczyca | PLCZ | precipitation | inside | 1982–2011 | 30 |
| 37 | Pilica | PILI | precipitation | inside | 1982–2011 | 30 |
| 38 | Piotrków Trybunalski | PIOT | precipitation | inside | 4, 1982–2011 | 30 |
| 39 | Plucice | PLUC | precipitation | inside | 1991–2011 | 20 ** |

**Table S1.** *Cont.*

| **No.** | **Station Name** | **Code** | **Station Type** | **Localisation (Relation to Catchment)** | **Period of Available Data** | **Years** |
| --- | --- | --- | --- | --- | --- | --- |
| 40 | Przedbórz | PRZE | precipitation | inside | 1982–2011 | 30 |
| 41 | Sędziszów | SEDZ | precipitation | outside | 1982–2011 | 30 |
| 42 | Spała/Teofilów * | SPAL | precipitation | outside | 1982–2011 | 30 |
| 43 | Stanowiska | STAN | precipitation | inside | 1984–2011 | 28 |
| 44 | Suchedniów | SUCH | precipitation | outside | 1982–2011 | 30 |
| 45 | Wolbrom | WOLB | precipitation | outside | 1982–2011 | 30 |
| 46 | Wymysłów | WYMY | precipitation | inside | 1991–2011 | 20 ** |

Notes: * Neighbouring stations (distance 1–3 km) that were merged because of complementary measurement data; ** Stations with more than five years of missing data.
